# Supplementary material for: Adherens junction remodelling during mitotic rounding of pseudostratified epithelial cells
Source: PubMed Central journal article supplement (PMC7132200; doi:10.15252/embr.201949700), 2020-02-07
Supplement: EMBR-21-e49700-s002.pdf [file EMBR-21-e49700-s002.pdf]

## Adherens junction remodelling during mitotic rounding of pseudostratified epithelial cells

Mario Aguilar-Aragon, Teresa T Bonello, Graham P Bell, Georgina C Fletcher & Barry J Thompson

---

### Review timeline:

|                     |                  |
|---------------------|------------------|
| Submission date:    | 18 November 2019 |
| Editorial Decision: | 27 November 2019 |
| Revision received:  | 10 December 2019 |
| Accepted:           | 15 January 2020  |

---

Editor: Deniz Senyilmaz-Tiebe

### Transaction Report: This manuscript was transferred to *EMBO reports* following peer review at *The EMBO Journal*

(Note: With the exception of the correction of typographical or spelling errors that could be a source of ambiguity, letters and reports are not edited. The original formatting of letters and referee reports may not be reflected in this compilation.)

Transfer

18 November 2019

---

### Referee #1:

In this study, the authors address the important question how cells undergo mitotic rounding in the crowdedness of a growing epithelium, focusing on a specialized epithelial type, the pseudostratified epithelium. They claim that cells in these epithelia downregulate cadherin while rounding and that this depends on Rho kinase mediated actomyosin contractility, differently from what occurs in cuboidal epithelia. As pseudostratified epithelia are common in many developing tissues but their cell biology the molecular mechanisms underlying cell biological features are so far understudied, this work is a potentially important contribution. While many initial observations in this study are interesting, some of them fall short in the depth of experimental design and insight. Further, some parts of the manuscript seem sloppy and are in need for improvement (scale bars!!). On the other hand, the authors tend to overstate some of their findings. Thus, more controls and other experiments should be performed before this manuscript is ready for publication. Alternatively, the authors would need to tune down some of their claims.

### Major points

- The authors conclude their abstract by saying that 'mitosis in pseudostratified epithelia necessitates planar spindle orientation by septate junctions to maintain epithelial integrity' However, this statement is not yet verified in their data. More experiments need to be done to justify this statement or it needs to be removed (see below).

> **We thank the reviewer for raising this important point. We have now modified the language used, to specify that we are talking about *Drosophila*: “Thus, in *Drosophila* pseudostratified epithelia, disruption of adherens junction during necessitates planar spindle orientation by septate junctions to maintain epithelial integrity”. Further work is need to investigate whether E-cadherin is also reduced during mitosis in mammalian pseudostratified epithelia, and if so, whether these cells would then require other junctions such as tight junctions to orient the spindle.**

- Figure 2, do cells delaminate upon excessive Rock inhibitor treatment? If not, how could this be explained?

**> Since the entire disc is treated for several hours, the tissue slowly loses integrity of junctions and ends up quite abnormal (with delamination of cells), but is difficult to analyse in these movies. We therefore do not draw any specific conclusions except that E-cadherin is strongly reduced under these conditions.**

- Can the authors comment on what happens to mitosis itself in case of Rho dependent contractility inhibition and in case cadherin stays at the junctions?

**> This is an interesting point. In our experiments, treatment with Rock-inhibitor appears to trap cells in a rounded state, as if the cell is still 'trying to round up and complete mitosis and cytokinesis'. Existing literature suggests that this is because complete rounding is required for formation of a proper spindle, such that Rock-inhibitor treatment can lead to a spindle assembly checkpoint delay (see for example Buzz Baum's and Manuel Thery's work cited in our manuscript).**

- The interpretation of Figure 4 does not match the presented data. No extrusion is shown for either mutant tissue nor are problems with spindle orientation or mitotic rounding clear from the Panels. This data needs to be added or the statements need to be tuned down.

**> We agree. To address this point, we modify the text to emphasise that we are using Dcp1-positive apoptotic cells as a proxy for extruded cells. Similarly, we now emphasise that we are using p-MyoII as a proxy for proper mitotic rounding.**

- Figure 7C, how do the authors explain the upregulation of Myosin 2 without downregulation of Cadherin in cells that had already entered mitosis when the drug was applied, as stated in text?

**> To clarify, these cells were arrested mid-way through rounding and so are not 'rounded enough' (don't undergo sufficient cell shape change) to downregulate E-cadherin. This supports our hypothesis that mechanical strain (shape change), rather than stress (MyoII-mediated tension), is the key factor in downregulating E-cadherin.**

- The authors conclude a lot about the role of 'mechanical strain' in their phenomenon. However, no experiment has really addressed the mechanics of the system, as so far all experiments are molecular inhibitions and depletions. In this context more experiments need to be added or it has to be clarified that Figure 6D is a hypothesis that has not yet been confirmed (on the mechanical strain part). The same applies when the authors refer to 'mechanosensitive junction remodeling' in the discussion.

**> We accept this comment. We have now clarified the text to explain that this figure (revised 7D) represents our hypothesis that cell shape change (mechanical strain) is causing downregulation of E-cadherin. We also soften our language and specifically reduce the use of the terms 'mechanical strain' and 'mechanosensitive' in the revised manuscript.**

Figure comments

- All Figures lack scale bars! That is hardly acceptable for a manuscript sent to a journal for review. Scale bars need to be added to all Figures and need to be explained in legends.

**> Fixed.**

- The schemes seem a bit underdeveloped and could be aesthetically improved.

**> We have now updated the graphical abstract.**

- All bar graphs should be replaced by graphs showing data points as for example done in Figure 3A and all of Figure 4 according to current state of the art.

- Figure 2B and C lower panels are very pixilated and should be replaced. Same for Figure 3B.

**> We apologise for this, which is caused by our imaging of whole discs, and then zooming in on single cells. Unfortunately, since my lab is currently moving to Australia, I don't have access to the slides to re-image. Instead, we hope the quantification provided is sufficient.**

- Figure 3B, graph, what does 100% refer to?

**> To clarify, the p-MLC intensity was measured in ImageJ and then expressed as a percentage of the maximum measured intensity observed.**

Minor comments

- The material and methods section is very sparse. More details on experiments and statistics could be added.

**Fixed.**

- In the manuscript the authors jump a lot between Figure 4 and 3 which makes it hard to follow the flow and Figures, this should be reshuffled.

**Fixed.**

- Figure 3C is never mentioned in the text...???

**Fixed.**

**Referee #2:**

In this manuscript Aguilar-Aragon et al delineate a molecular pathway controlling cell shape changes during mitosis (rounding) in pseudostratified *Drosophila* epithelial cells. They demonstrate that activation of actomyosin contractility leads to E-cadherin downregulation and adherens junction disassembly, presumably through mechanical forces. They further dissect the molecular pathway linking the cell cycle machinery with mitotic rounding which they show requires Aurora A/B kinase activation of the RhoGEF (Pbl). They speculate that this might explain why spindle orientation in pseudostratified epithelia requires septate junction but not adherens junctions. Consistently, they show that in simple epithelial cells, such as cuboidal follicle cells in the *Drosophila* ovary, which undergo only moderate cell shape changes during mitosis, adherens junctions do not disassemble. Collectively these results provide molecular explanation of how epithelial cells with complex shape divide without compromising tissue integrity.

The experiments are well-controlled and the results, which are based on a combination of *Drosophila* genetics, pharmacological perturbations and imaging, support the main conclusions of the manuscript. The results could be furtherer strengthened if the authors could show that acute activation of actomyosin contractility leads to cadherin disassembly by using for example optogenetics. However, I do appreciate that this experiment might be tricky to implement in the wing disk.

**> This is a really interesting suggestion, although we are unfortunately not set up to perform this experiment in wing discs for technical reasons, although this might form the basis for a long-term future project on optogenetics.**

While I very much like the experimental design undertaken, I find that the text requires some modifications. Several terminologies appear to be not fully justified given the data shown. In particular the use of "mechanosensitive" in the title, abstract and throughout the manuscript should be replaced with something like "mechanical forces". Mechanosensitive implies sensing mechanisms (see for example talin, integrin or piezo) which have not been here demonstrated.

**> This is an important point. In the revised manuscript, we have avoided the use of the term 'mechanosensitive' in the title, abstract and elsewhere, as suggested.**

Also, there are several occasions where the authors refer to mechanical strain and stress which have not been measured. The parallel between cell shape changes and mechanical strain in this context seems preliminary as cell shape changes can occur also by non-mechanical mechanisms (modulation of endo/exocytosis or membrane remodeling). I suggest to stick to a more generic "cell shape changes" terminology and clearly indicate when specific terminology is used in a speculative manner. For example, see p. 9 " This dramatic increase in mechanical strain (shape change) driven by increased mechanical stress (global contractility) during mitotic rounding may disrupt cadherin-cadherin contacts between neighbouring cells to favour endocytosis".

**> We accept this point. We have now primarily use 'cell shape changes' rather than 'mechanical strain' in the revised manuscript.**

Lastly please avoid the excessive use of non-quantitative adjectives such as "dramatic/strong/very" as they disturb the reading of the manuscript see for example p.6 "The plasma membrane localisation of GFP-Tum during mitosis is not as strong as that found at the cytokinetic furrow or at ring canals formed after cytokinesis, but is nevertheless much stronger than that occurring during interphase".

**> A very good point. We have now altered the language accordingly.**

---

1st Editorial Decision

27 November 2019

Thank you for transferring your manuscript to EMBO Reports. Your manuscript has been reviewed and revised at another journal. Having looked at everything carefully, I would like to invite a minor revision, before I can accept the manuscript.

---

1st Revision - authors' response

10 December 2019

The authors performed all minor editorial changes.

YOU MUST COMPLETE ALL CELLS WITH A PINK BACKGROUND ↓

PLEASE NOTE THAT THIS CHECKLIST WILL BE PUBLISHED ALONGSIDE YOUR PAPER

Corresponding Author Name: Barry Thompson

Journal Submitted to: EMBO reports

Manuscript Number: EMBOR-2019-49700

**Reporting Checklist For Life Sciences Articles (Rev. June 2017)**

This checklist is used to ensure good reporting standards and to improve the reproducibility of published results. These guidelines are consistent with the Principles and Guidelines for Reporting Preclinical Research issued by the NIH in 2014. Please follow the journal's authorship guidelines in preparing your manuscript.

**A- Figures****1. Data****The data shown in figures should satisfy the following conditions:**

- the data were obtained and processed according to the field's best practice and are presented to reflect the results of the experiments in an accurate and unbiased manner.
- figure panels include only data points, measurements or observations that can be compared to each other in a scientifically meaningful way.
- graphs include clearly labeled error bars for independent experiments and sample sizes. Unless justified, error bars should not be shown for technical replicates.
- if  $n < 5$ , the individual data points from each experiment should be plotted and any statistical test employed should be justified
- Source Data should be included to report the data underlying graphs. Please follow the guidelines set out in the author ship guidelines on Data Presentation.

**2. Captions****Each figure caption should contain the following information, for each panel where they are relevant:**

- a specification of the experimental system investigated (eg cell line, species name).
- the assay(s) and method(s) used to carry out the reported observations and measurements
- an explicit mention of the biological and chemical entity(ies) that are being measured.
- an explicit mention of the biological and chemical entity(ies) that are altered/ varied/ perturbed in a controlled manner.
- the exact sample size (n) for each experimental group/condition, given as a number, not a range;
- a description of the sample collection allowing the reader to understand whether the samples represent technical or biological replicates (including how many animals, litters, cultures, etc.).
- a statement of how many times the experiment shown was independently replicated in the laboratory.
- definitions of statistical methods and measures:
  - common tests, such as t-test (please specify whether paired vs. unpaired), simple  $\chi^2$  tests, Wilcoxon and Mann-Whitney tests, can be unambiguously identified by name only, but more complex techniques should be described in the methods section;
  - are tests one-sided or two-sided?
  - are there adjustments for multiple comparisons?
  - exact statistical test results, e.g., P values = x but not P values < x;
  - definition of 'center values' as median or average;
  - definition of error bars as s.d. or s.e.m.

Any descriptions too long for the figure legend should be included in the methods section and/or with the source data.

In the pink boxes below, please ensure that the answers to the following questions are reported in the manuscript itself. Every question should be answered. If the question is not relevant to your research, please write NA (non applicable). We encourage you to include a specific subsection in the methods section for statistics, reagents, animal models and human subjects.

**B- Statistics and general methods**

Please fill out these boxes ↓ (Do not worry if you cannot see all your text once you press return)

|                                                                                                                                                                                         |                                                                                                                                                                                                                                                                                                                                                                                                    |
|-----------------------------------------------------------------------------------------------------------------------------------------------------------------------------------------|----------------------------------------------------------------------------------------------------------------------------------------------------------------------------------------------------------------------------------------------------------------------------------------------------------------------------------------------------------------------------------------------------|
| 1.a. How was the sample size chosen to ensure adequate power to detect a pre-specified effect size?                                                                                     | We sought to analyse biological phenotypes with effects of large magnitude, such as differences of 2.0 standard deviations from the mean or greater. By choosing to focus on such large effect sizes, the number of samples necessary to ensure adequate statistical power is small, usually less than 10 to 20 cells per sample.                                                                  |
| 1.b. For animal studies, include a statement about sample size estimate even if no statistical methods were used.                                                                       | Drosophila genetics allows large numbers of experimental animals to be generated, with generally more than 50 animals dissected for each experiment. The final number of tissues examined after fixation and staining therefore ranged from 3 to 50, with the number of cells per sample ranging from 100 to 30,000, and the number of mitotic cell per sample ranging from approximately 1 to 10. |
| 2. Describe inclusion/exclusion criteria if samples or animals were excluded from the analysis. Were the criteria pre-established?                                                      | No samples were excluded from the analysis. The analysis was stopped once a sufficient sample size had been obtained.                                                                                                                                                                                                                                                                              |
| 3. Were any steps taken to minimize the effects of subjective bias when allocating animals/samples to treatment (e.g. randomization procedure)? If yes, please describe.                | By choosing to focus on experimental results with clear and strong phenotypic differences between genotypes, the risk of subjective bias was reduced. In the case of weak phenotypes, increased sample sizes and blind scoring were used to avoid bias.                                                                                                                                            |
| For animal studies, include a statement about randomization even if no randomization was used.                                                                                          | No randomization was used in this study.                                                                                                                                                                                                                                                                                                                                                           |
| 4.a. Were any steps taken to minimize the effects of subjective bias during group allocation or/and when assessing results (e.g. blinding of the investigator)? If yes please describe. | Blinding was only employed where weak phenotypes led to a risk of mis-scoring.                                                                                                                                                                                                                                                                                                                     |
| 4.b. For animal studies, include a statement about blinding even if no blinding was done                                                                                                | Blinding was only employed where weak phenotypes led to a risk of mis-scoring.                                                                                                                                                                                                                                                                                                                     |
| 5. For every figure, are statistical tests justified as appropriate?                                                                                                                    | Differences between experimental groups were of large enough magnitude (more than 2 standard deviations) to be visually obvious in the quantification, so did not require statistical tests to establish their differences. Otherwise, a paired two-tailed t-test was used to establish statistical significance for small effect sizes.                                                           |
| Do the data meet the assumptions of the tests (e.g., normal distribution)? Describe any methods used to assess it.                                                                      | Visually, our data appears normally distributed.                                                                                                                                                                                                                                                                                                                                                   |

**USEFUL LINKS FOR COMPLETING THIS FORM**<http://www.antibodypedia.com><http://1degrebio.org><http://www.equator-network.org/reporting-guidelines/improving-bioscience-research-repo><http://grants.nih.gov/grants/olaw/olaw.htm><http://www.mrc.ac.uk/Ourresearch/Ethicsresearchguidance/Useofanimals/index.htm><http://ClinicalTrials.gov><http://www.consort-statement.org><http://www.consort-statement.org/checklists/view/32-consort/66-title><http://www.equator-network.org/reporting-guidelines/reporting-recommendations-for-tur><http://datadryad.org><http://figshare.com><http://www.ncbi.nlm.nih.gov/gap><http://www.ebi.ac.uk/ega><http://biomodels.net/><http://biomodels.net/miriam/><http://jij.biochem.sun.ac.za>[http://oba.od.nih.gov/biosecurity/biosecurity\\_documents.html](http://oba.od.nih.gov/biosecurity/biosecurity_documents.html)<http://www.selectagents.gov/>

|                                                                                   |                                                                     |
|-----------------------------------------------------------------------------------|---------------------------------------------------------------------|
| Is there an estimate of variation within each group of data?                      | Standard deviations from the mean are shown on each quantification. |
| Is the variance similar between the groups that are being statistically compared? | Yes.                                                                |

### C- Reagents

|                                                                                                                                                                                                                                                                                                                              |     |
|------------------------------------------------------------------------------------------------------------------------------------------------------------------------------------------------------------------------------------------------------------------------------------------------------------------------------|-----|
| 6. To show that antibodies were profiled for use in the system under study (assay and species), provide a citation, catalog number and/or clone number, supplementary information or reference to an antibody validation profile. e.g., Antibodypedia (see link list at top right), IDegreeBio (see link list at top right). | N/A |
| 7. Identify the source of cell lines and report if they were recently authenticated (e.g., by STR profiling) and tested for mycoplasma contamination.                                                                                                                                                                        | N/A |

\* for all hyperlinks, please see the table at the top right of the document

### D- Animal Models

|                                                                                                                                                                                                                                                                                                                                                                                    |     |
|------------------------------------------------------------------------------------------------------------------------------------------------------------------------------------------------------------------------------------------------------------------------------------------------------------------------------------------------------------------------------------|-----|
| 8. Report species, strain, gender, age of animals and genetic modification status where applicable. Please detail housing and husbandry conditions and the source of animals.                                                                                                                                                                                                      | N/A |
| 9. For experiments involving live vertebrates, include a statement of compliance with ethical regulations and identify the committee(s) approving the experiments.                                                                                                                                                                                                                 | N/A |
| 10. We recommend consulting the ARRIVE guidelines (see link list at top right) (PLoS Biol. 8(6), e1000412, 2010) to ensure that other relevant aspects of animal studies are adequately reported. See author guidelines, under 'Reporting Guidelines'. See also: NIH (see link list at top right) and MRC (see link list at top right) recommendations. Please confirm compliance. | N/A |

### E- Human Subjects

|                                                                                                                                                                                                                                                                                                                    |     |
|--------------------------------------------------------------------------------------------------------------------------------------------------------------------------------------------------------------------------------------------------------------------------------------------------------------------|-----|
| 11. Identify the committee(s) approving the study protocol.                                                                                                                                                                                                                                                        | N/A |
| 12. Include a statement confirming that informed consent was obtained from all subjects and that the experiments conformed to the principles set out in the WMA Declaration of Helsinki and the Department of Health and Human Services Belmont Report.                                                            | N/A |
| 13. For publication of patient photos, include a statement confirming that consent to publish was obtained.                                                                                                                                                                                                        | N/A |
| 14. Report any restrictions on the availability (and/or on the use) of human data or samples.                                                                                                                                                                                                                      | N/A |
| 15. Report the clinical trial registration number (at ClinicalTrials.gov or equivalent), where applicable.                                                                                                                                                                                                         | N/A |
| 16. For phase II and III randomized controlled trials, please refer to the CONSORT flow diagram (see link list at top right) and submit the CONSORT checklist (see link list at top right) with your submission. See author guidelines, under 'Reporting Guidelines'. Please confirm you have submitted this list. | N/A |
| 17. For tumor marker prognostic studies, we recommend that you follow the REMARK reporting guidelines (see link list at top right). See author guidelines, under 'Reporting Guidelines'. Please confirm you have followed these guidelines.                                                                        | N/A |

### F- Data Accessibility

|                                                                                                                                                                                                                                                                                                                                                                                                                                                                                                                                                                                                                                                                                                   |     |
|---------------------------------------------------------------------------------------------------------------------------------------------------------------------------------------------------------------------------------------------------------------------------------------------------------------------------------------------------------------------------------------------------------------------------------------------------------------------------------------------------------------------------------------------------------------------------------------------------------------------------------------------------------------------------------------------------|-----|
| 18. Provide a "Data Availability" section at the end of the Materials & Methods, listing the accession codes for data generated in this study and deposited in a public database (e.g. RNA-Seq data: Gene Expression Omnibus GSE39462, Proteomics data: PRIDE PXD000208 etc.) Please refer to our author guidelines for 'Data Deposition'.<br><br>Data deposition in a public repository is mandatory for:<br>a. Protein, DNA and RNA sequences<br>b. Macromolecular structures<br>c. Crystallographic data for small molecules<br>d. Functional genomics data<br>e. Proteomics and molecular interactions                                                                                        | N/A |
| 19. Deposition is strongly recommended for any datasets that are central and integral to the study; please consider the journal's data policy. If no structured public repository exists for a given data type, we encourage the provision of datasets in the manuscript as a Supplementary Document (see author guidelines under 'Expanded View' or in unstructured repositories such as Dryad (see link list at top right) or Figshare (see link list at top right).                                                                                                                                                                                                                            | N/A |
| 20. Access to human clinical and genomic datasets should be provided with as few restrictions as possible while respecting ethical obligations to the patients and relevant medical and legal issues. If practically possible and compatible with the individual consent agreement used in the study, such data should be deposited in one of the major public access-controlled repositories such as dbGAP (see link list at top right) or EGA (see link list at top right).                                                                                                                                                                                                                     | N/A |
| 21. Computational models that are central and integral to a study should be shared without restrictions and provided in a machine-readable form. The relevant accession numbers or links should be provided. When possible, standardized format (SBML, CellML) should be used instead of scripts (e.g. MATLAB). Authors are strongly encouraged to follow the MIRIAM guidelines (see link list at top right) and deposit their model in a public database such as Biocompare (see link list at top right) or JWS Online (see link list at top right). If computer source code is provided with the paper, it should be deposited in a public repository or included in supplementary information. | N/A |

### G- Dual use research of concern

|                                                                                                                                                                                                                                                                                               |     |
|-----------------------------------------------------------------------------------------------------------------------------------------------------------------------------------------------------------------------------------------------------------------------------------------------|-----|
| 22. Could your study fall under dual use research restrictions? Please check biosecurity documents (see link list at top right) and list of select agents and toxins (APHIS/CDC) (see link list at top right). According to our biosecurity guidelines, provide a statement only if it could. | N/A |
|-----------------------------------------------------------------------------------------------------------------------------------------------------------------------------------------------------------------------------------------------------------------------------------------------|-----|
